# Supplementary material for: The Majority of Adult Pneumococcal Invasive Infections in Portugal Are Still Potentially Vaccine Preventable in Spite of Significant Declines of Serotypes 1 and 5
Source: PLOS journal article supplement (doi:10.1371/journal.pone.0073704), 2013-09-16
Supplement: S1 (10.1371/journal.pone.0073704.s001) [file journal.pone.0073704.s001]

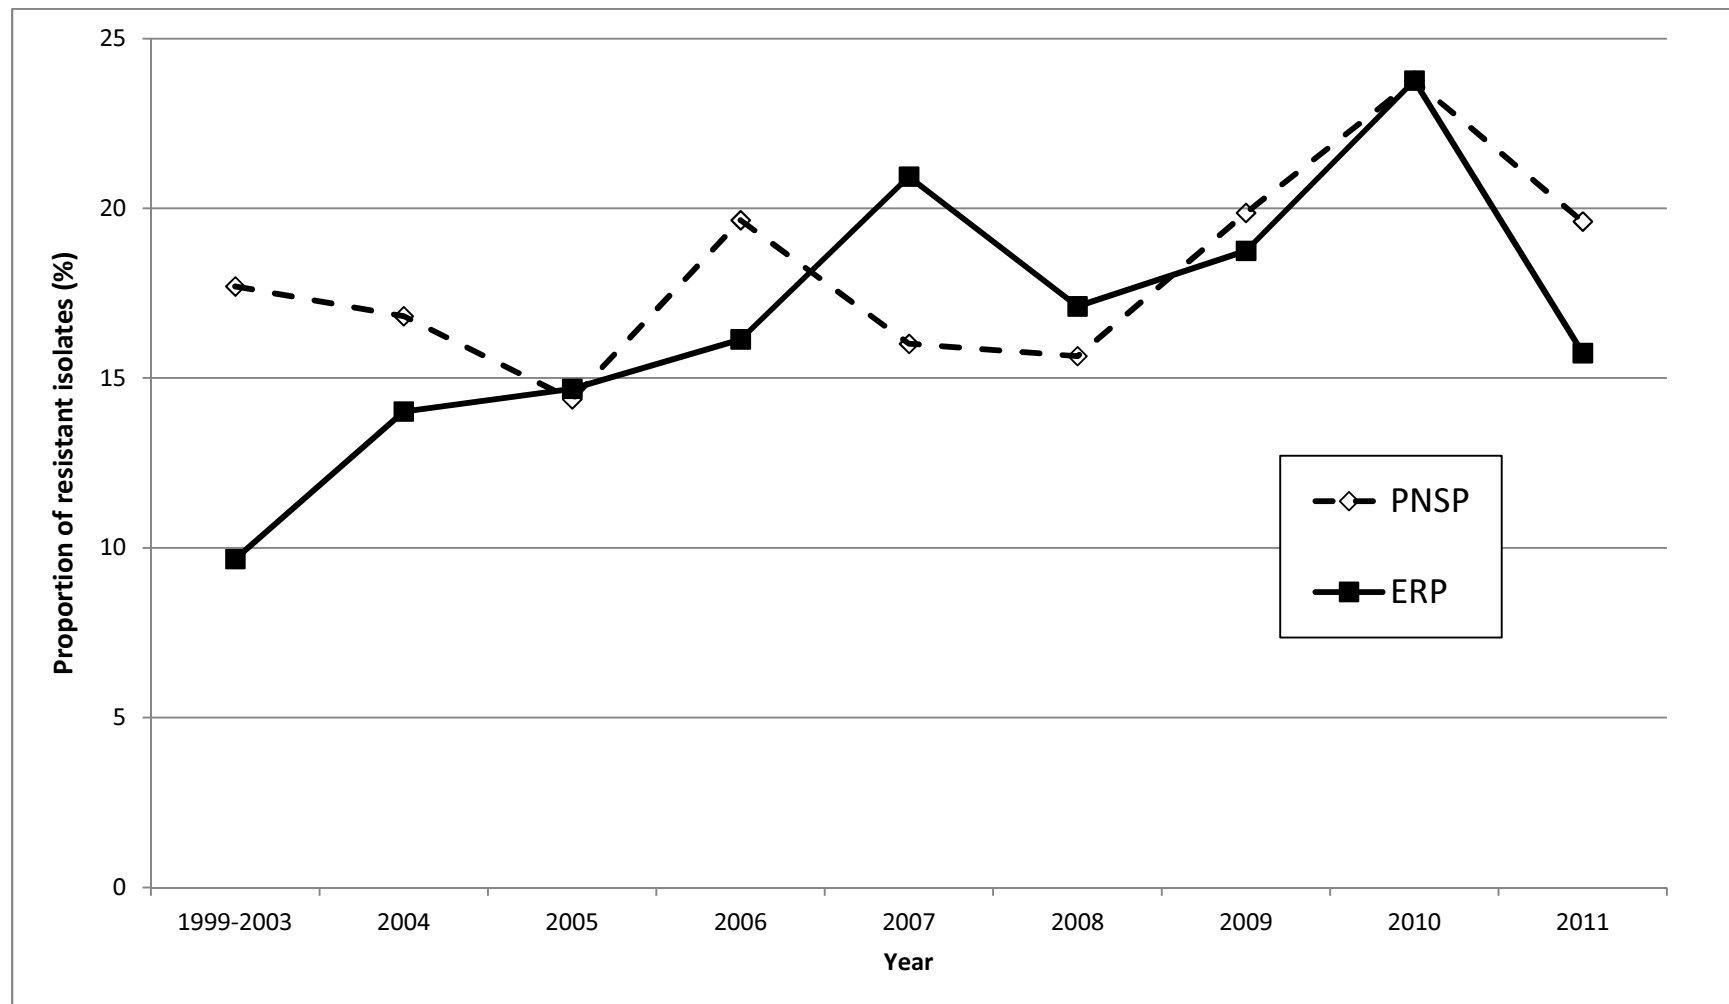

**Figure S1. Proportion of penicillin non-susceptible pneumococci (PNSP) and erythromycin resistant pneumococci (ERP) (1999-2011).** The period 1999-2003, previously identified as the pre-PCV7 period, was analyzed together.
