# Supplementary material for: The Majority of Adult Pneumococcal Invasive Infections in Portugal Are Still Potentially Vaccine Preventable in Spite of Significant Declines of Serotypes 1 and 5
Source: PLOS journal article supplement (doi:10.1371/journal.pone.0073704), 2013-09-16
Supplement: S3 (10.1371/journal.pone.0073704.s003) [file journal.pone.0073704.s003]

**Table S2. Capsular types of the isolates recovered from CSF between 2009 and 2011.**

| Serotype   | No. isolates |           | OR (CI <sub>95%</sub> )  |
|------------|--------------|-----------|--------------------------|
|            | CSF          | non-CSF   |                          |
| 3          | 9            | 151       | 0.69 (0.30-1.41)         |
| 19A        | 9            | 106       | 1.02 (0.44-2.11)         |
| <b>19F</b> | <b>7</b>     | <b>19</b> | <b>4.69 (1.62-12.05)</b> |
| <b>6B</b>  | <b>6</b>     | <b>13</b> | <b>5.84 (1.78-16.95)</b> |
| 11A        | 5            | 34        | 1.81 (0.54-4.81)         |
| <b>16F</b> | <b>5</b>     | <b>13</b> | <b>4.82 (1.32-14.80)</b> |
| 7F         | 5            | 121       | 0.47 (0.15-1.17)         |
| 22F        | 4            | 51        | 0.94 (0.24-2.65)         |
| 33A        | 4            | 12        | 4.14 (0.95-14.00)        |
| 1          | 3            | 84        | 0.41 (0.08-1.29)         |
| 14         | 3            | 103       | 0.33 (0.07-1.02)         |
| 10A        | 3            | 18        | 2.04 (0.38-7.17)         |

<sup>a</sup> Odds ratio (OR) and 95% confidence intervals (CI<sub>95%</sub>) are shown for serotypes that were represented by at least 3 isolates.

<sup>b</sup> In bold are the serotypes with significant p-values after FDR correction.
